# Supplementary material for: The long noncoding RNA CASC2 functions as a competing endogenous RNA by sponging miR-18a in colorectal cancer
Source: PubMed Central journal article supplement (PMC4873821; doi:10.1038/srep26524), 2016-05-20

# Long noncoding RNA CASC2 functions as a competing endogenous RNA by sponging miR-18a in colorectal cancer

Guangli Huang, Xiaoli Wu, Shi Li, Xiaoqun Xu, Hua Zhu, Xiangjian Chen

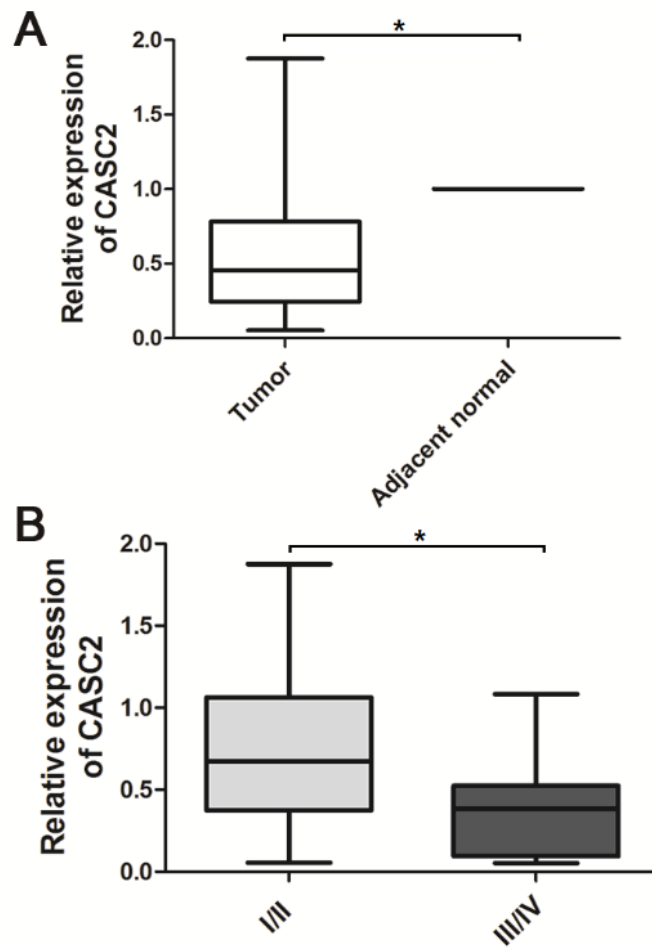

Supplement: srep26524-s1.pdf [file srep26524-s1.pdf]
